# Supplementary material for: A microfluidic platform for chemoresistive testing of multicellular pleural cancer spheroids
Source: Royal Society of Chemistry journal article supplement (doi:10.1039/c3lc51093j), 2014-01-01
Supplement: c3lc51093j.pdf [file c3lc51093j.pdf]

# Microfluidic platform for chemoresistive testing of multicellular pleural cancer spheroids<sup>†</sup>

## Supplementary Material

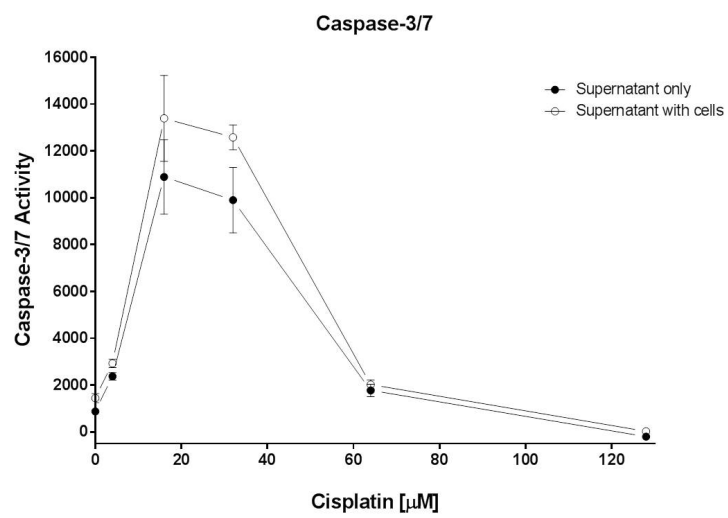

**Fig. 1 S1:** Caspase-3/7 activity in spheroids ( $n=3$ ). Analysis were done either with only supernatant or with samples containing the spheroids. Data are means  $\pm$  SEM.

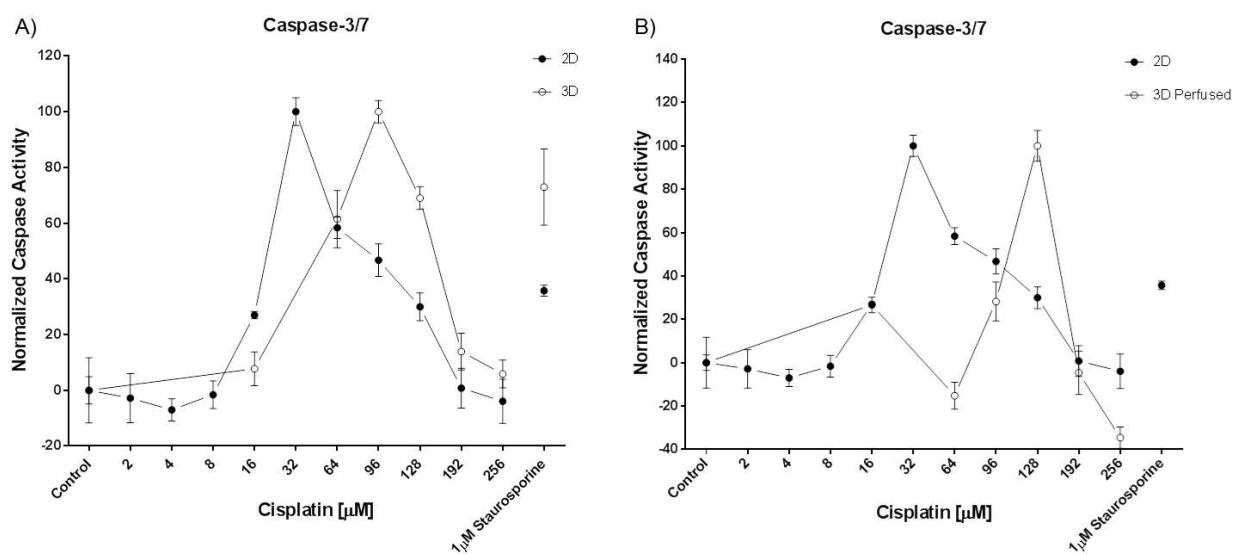

**Fig. 2 S2:** Caspase-3/7 activity comparison between 2D and 3D ( $n \geq 3$ )(A) as well as 2D and 3D Perfused ( $n \geq 3$ )(B). Data are means  $\pm$  SEM.
